# Supplementary material for: Ionic liquid-doped and p-NIPAAm-based copolymer (p-NIBIm): extraordinary drug-entrapping and -releasing behaviors at 38–42 °C
Source: Royal Society of Chemistry journal article supplement (doi:10.1039/c4ra03736g), 2014-01-01
Supplement: c4ra03736g1.pdf [file c4ra03736g1.pdf]

1 **Supporting information**

2 **Ionic liquid-doped and *p*-NIPAAm-based copolymer (*p*-NIBIm): extraordinary drug-**  
3 **entrapping and -releasing behaviors at 38-42 °C**

4 *Jae-Won Seo, Ji-Young Hwang, Ueon Sang Shin\**

5 Institute of Tissue Regeneration Engineering (ITREN), Dankook University, South Korea

6 Department of Nanobiomedical Science & BK21 PIUS NBM Global Research Center for

7 Regenerative Medicine, Dankook University, Cheonan, 330-714, Republic of Korea

8 \*Corresponding author: E-mail: [usshin12@dankook.ac.kr](mailto:usshin12@dankook.ac.kr); tel) +82 41 550 3691; fax) +82 41

9 559 7911

10

11 **Experimental data**

12 **Fig. S1** <sup>1</sup>H-NMR spectra of [BVIm]Br, *p*-NIBIm, *p*-BVIm, and *p*-NIPAAm.

13 a) <sup>1</sup>H-NMR spectrum of [BVIm]Br showed characteristic peaks as follows:

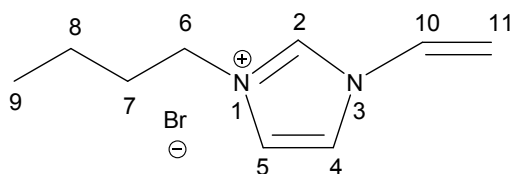

15 <sup>1</sup>H-NMR (*d*<sub>6</sub>-DMSO): (ppm) 0.91 (t, 3H-9), 1.30 (m, 2H-8), 1.82 (m, 2H-7), 4.22 (q, 2H-6),

16 5.43~5.44 (dd, 1H-11), 5.95~5.97 (dd, 1H-11), 7.32 (dd, 1H-10), 7.96 (s, 1H-4), 8.22 (s, 1H-

17 5), 9.59 (s, 1H-2).

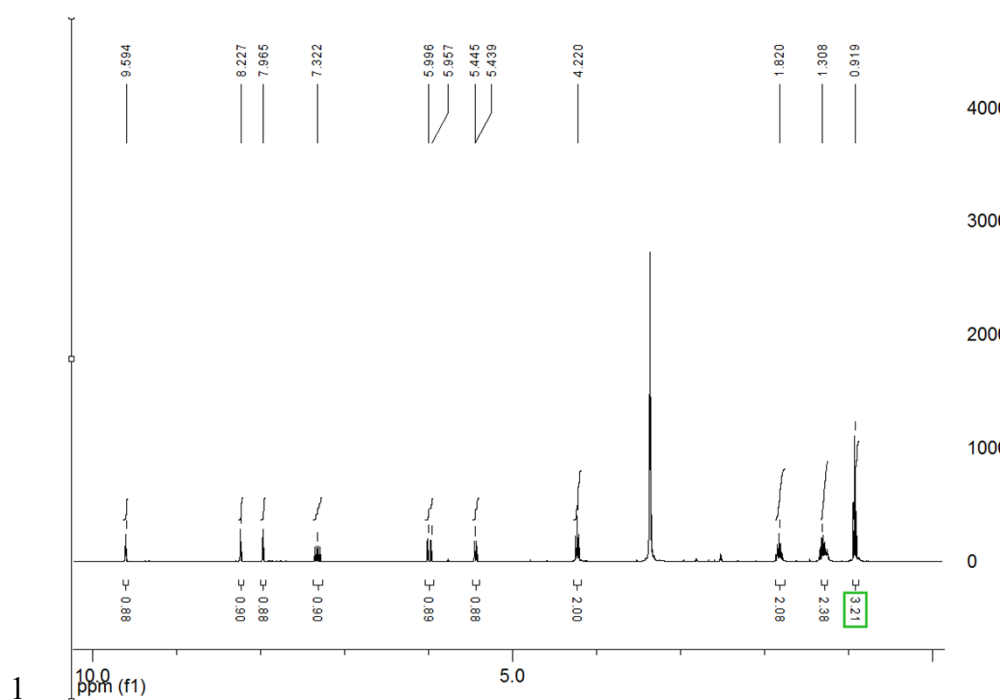

1

2

3 b)  $^1\text{H-NMR}$  spectrum of the *p*-NIBIm copolymer also showed characteristic peaks as follows:

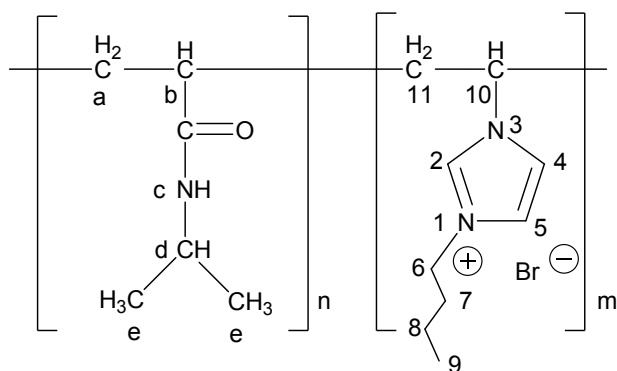

4

5  $^1\text{H-NMR}$  ( $d_6$ -DMSO): (ppm) 0.90 (bt, 3H-9), 0.97~1.17 (bd, 6H-e), 1.28~1.39 (bm + bd, 2H-

6 8 + 2H-11), 1.40~1.71 (bd, 2H-a), 1.73~1.88 (bm + bt, 2H-7 + 1H-10), 1.89~2.45 (bt, 1H-b),

7 3.84 (bm, 1H-d), 4.15 (bt, 2H-6), 6.90~7.64 (bt, 1H-c or 1NH), 7.65~7.95 (bd + bd, 1H-4 +

8 1H-5), 9.80 (bs, 1H-2).

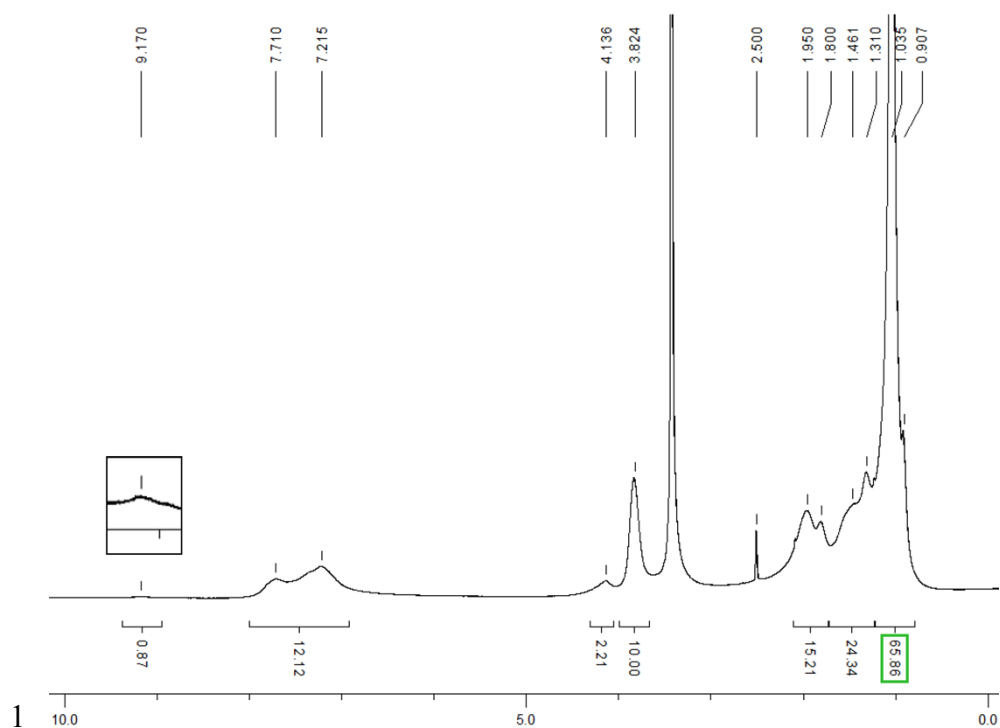

2 c)  $^1\text{H-NMR}$  spectrum of the *p*-BVIm showed characteristic peaks as follows:

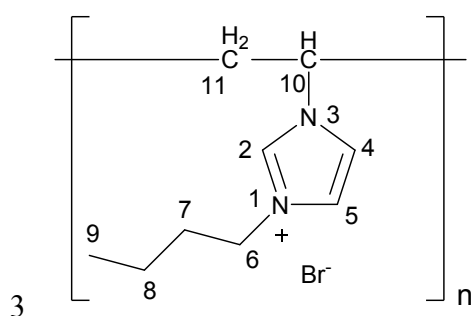

4  $^1\text{H-NMR}$  ( $d_6$ -DMSO): (ppm) 0.89 (bt, 3H-9), 1.27 (bm + bd, 2H-8 + 2H-11), 1.79 (bm + bt,

5 2H-7 + 1H-10), 4.1-4.3 (bt, 2H-6), 7.60~8.25 (bd + bd, 1H-4 + 1H-5), 9.4~9.8 (bs, 1H-2).

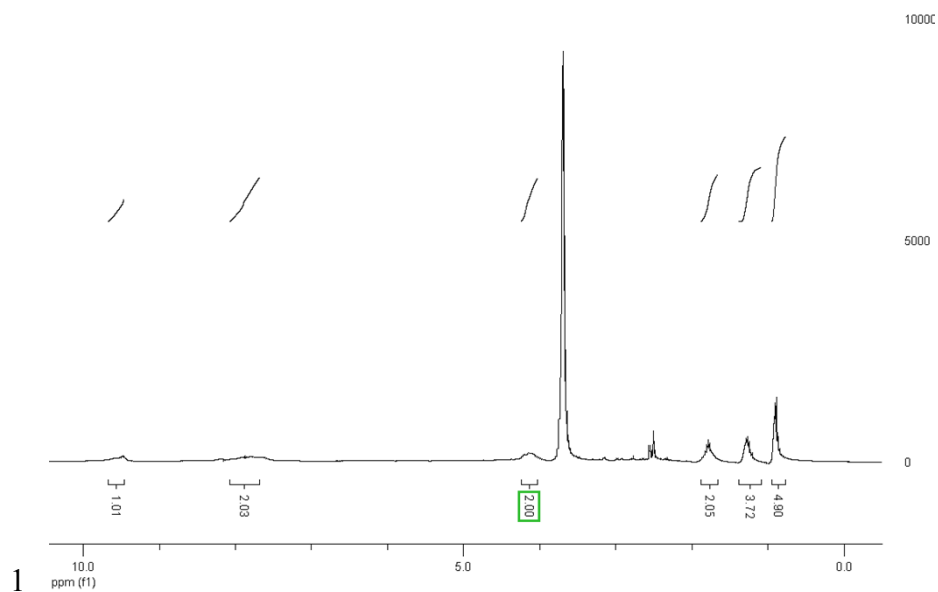

1

2

3 d)  $^1\text{H-NMR}$  spectrum of the *p*-NIPAAm polymer showed characteristic peaks as follows:

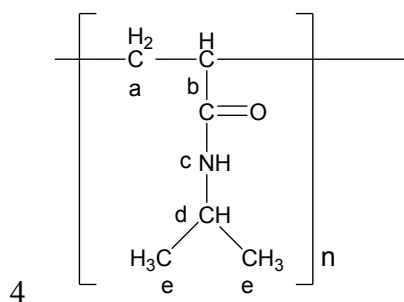

5  $^1\text{H-NMR}$  ( $d_6$ -DMSO): (ppm) 1.05 (m, 6H-e), 1.20~1.71 (bd, 2H-a), 1.96 (bt, 1H-b), 3.85 (m,

6 1H-d), 6.95~7.65 (bt, 1H-c or NH).

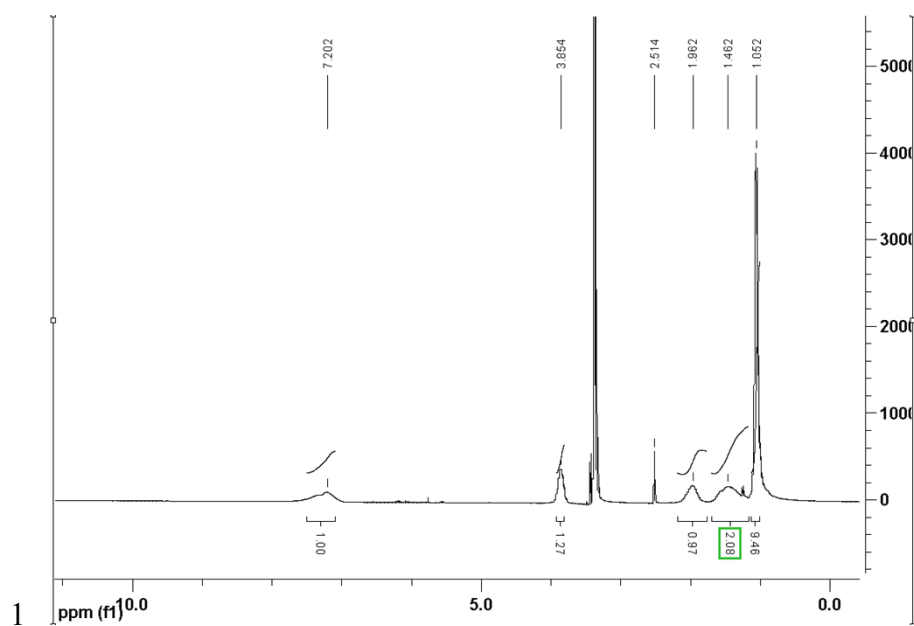

2

3 **Fig. S2** MALDI-TOF spectra of *p*-NIBIm, *p*-BVIm, and *p*-NIPAAm.

4 a) *p*-NIBIm

5  $M_n = 1353$ ;  $M_w = 2001$ ;  $M_w/M_n = 1.47$

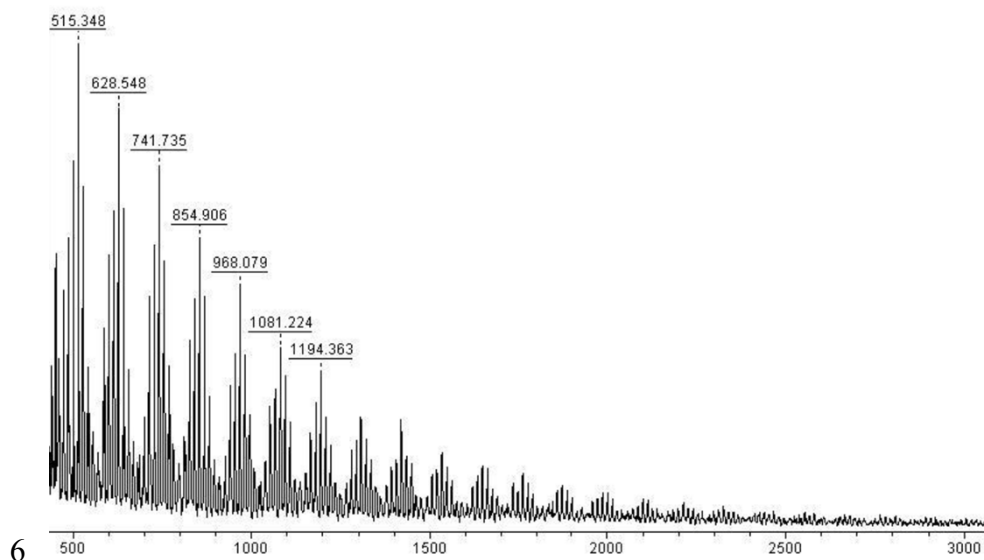

7

8 b) *p*-BVIm

9  $M_n = 2102$ ;  $M_w = 2114$ ;  $M_w/M_n = 1.0$

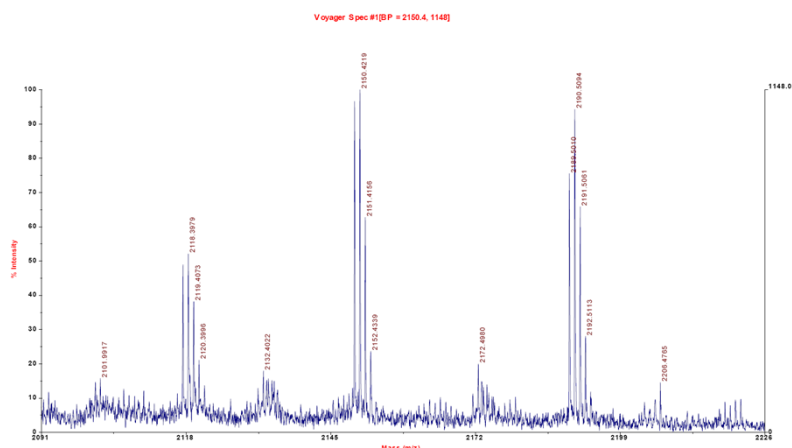

1

2 c) *p*-NIPAAm3  $M_n = 1998$ ;  $M_w = 2521$ ;  $M_w/M_n = 1.26$ 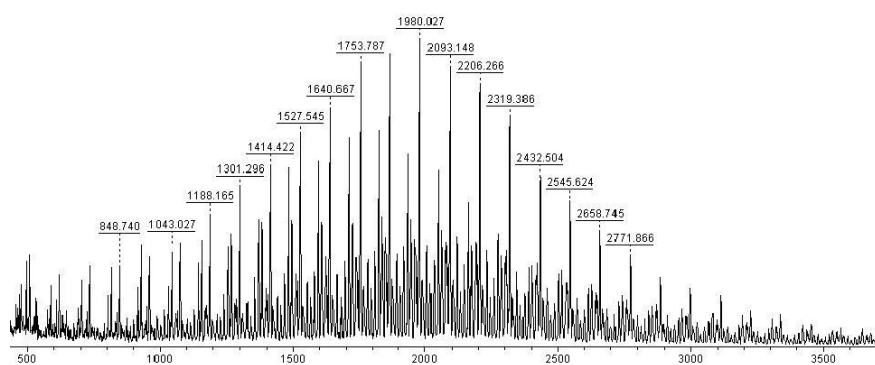

4

5

6 **Fig. S3** FT-IR spectra of *p*-NIBIm, *p*-BVIIm, and *p*-NIPAAm.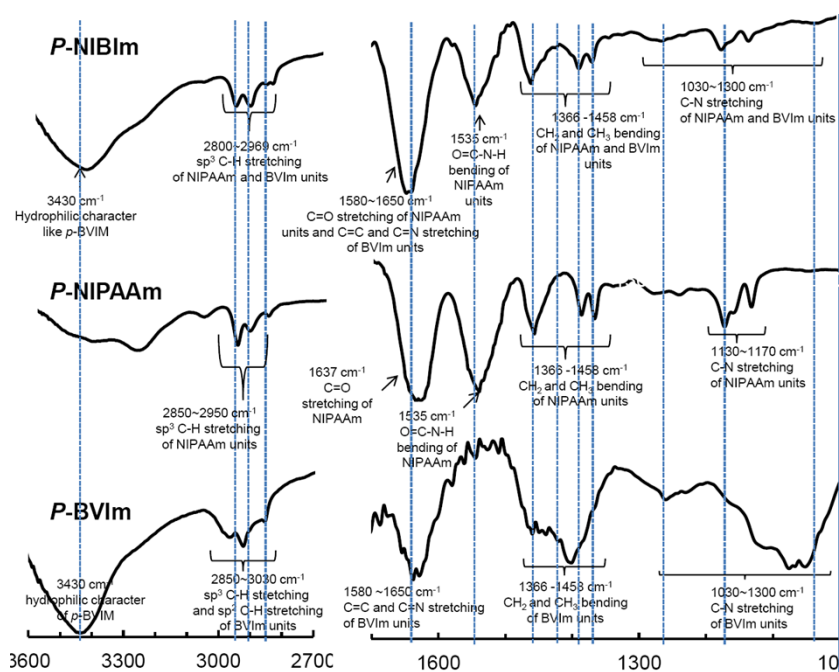

7

- 1 **Fig. S4** LCST determination of IL-doped *p*-NIBIm using DSC scan; a) via several continuous
- 2 heating and cooling cycles at pH=7 and b) in the acidic pH environments (pH=4-5).

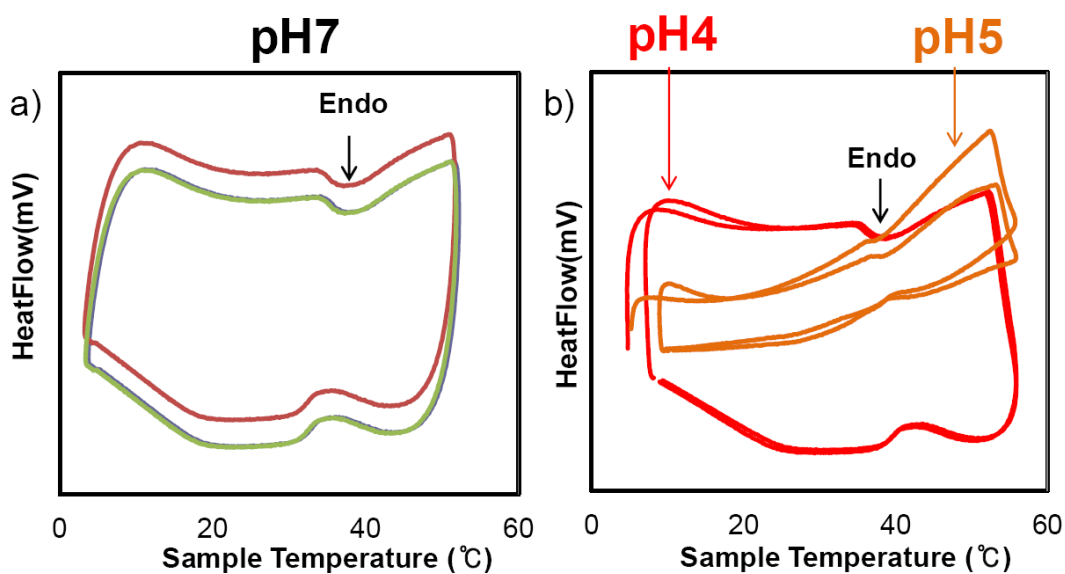

3

4

- 5 **Fig. S5** Colloidal stability of the aqueous *p*-NIBIm solution (0.5 mg/mL) at 37 °C.

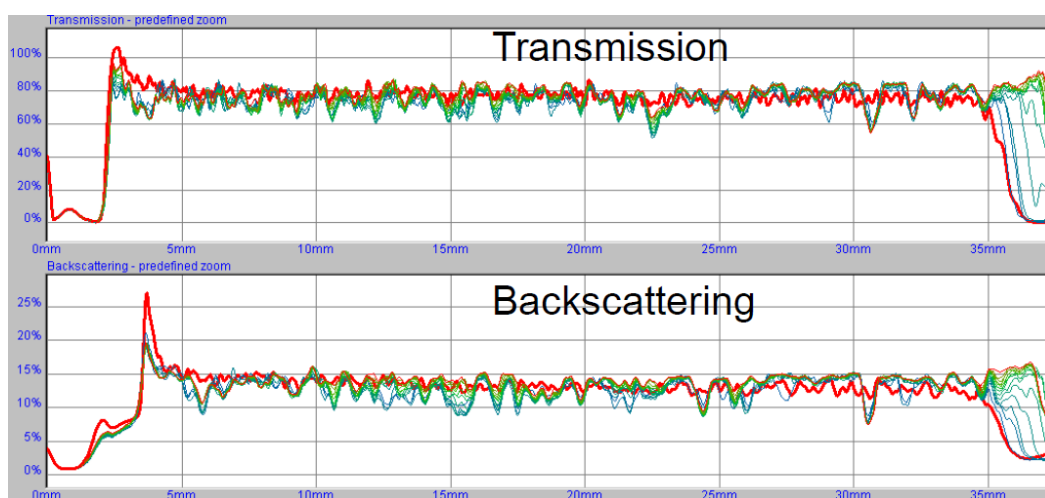

6

7

8

9

10

11

- 1 **Fig. S6** Temperature-dependant size change of the *p*-NIPAAm polymer and the complex with  
 2 BSA, *p*-NIPAAm/BSA.

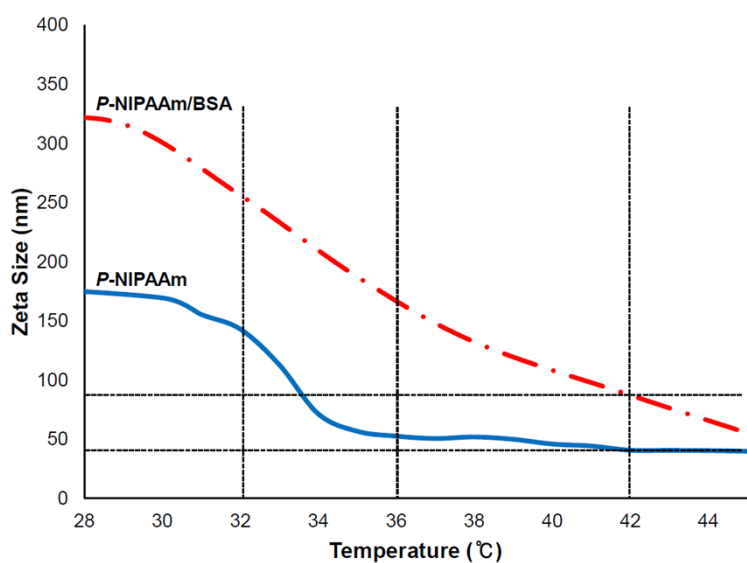

| Polymer              | Micelle size in diameter (nm) |           |            |           |          |
|----------------------|-------------------------------|-----------|------------|-----------|----------|
|                      | 25 °C                         | 30 °C     | 35 °C      | 40 °C     | 45 °C    |
| <i>p</i> -NIPAAm     | 180.6±5.1                     | 169.2±6.2 | 56.4± 12.7 | 45.7±4.7  | 40.8±7.1 |
| <i>p</i> -NIPAAm/BSA | 332.0± 9.8                    | 299.8±6.4 | 187.3±12.3 | 91.0±13.2 | 87± 11.2 |

3

4

- 5 **Fig. S7** The calibration curve, which is created by plotting the known BSA concentration on x  
 6 axis and the absorbance of BSA/DC complexes at  $\lambda_{\max}=750$  nm on y axis.

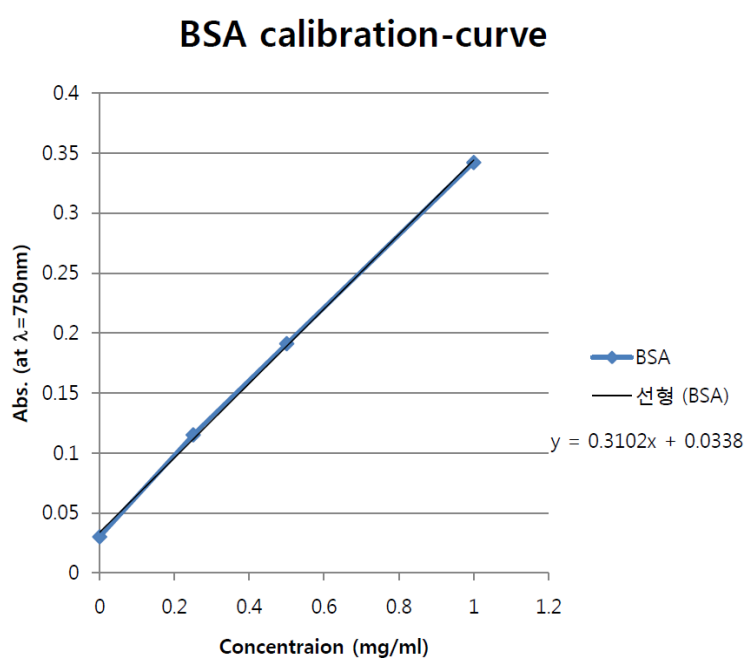

7
